# Supplementary material for: Photo-controlled bipolar absorption switches based on 5-dimethylamino substituted indoline spiropyrans with semipermanent merocyanines
Source: Royal Society of Chemistry journal article supplement (doi:10.1039/d1nj02371c), 2021-01-01
Supplement: d1nj02371c1.pdf [file d1nj02371c1.pdf]

## Electronic Supplementary Information

### Photo-controlled bipolar absorption switches based on 5-dimethylamino substituted indoline spiropyrans with semipermanent merocyanines

Anatoly Metelitsa<sup>\*a</sup>, Anatoly Chernyshev<sup>a</sup>, Nikolai Voloshin<sup>a</sup>, Oleg Demidov<sup>b</sup>,  
Ekaterina Solov'eva<sup>a</sup>, Irina Rostovtseva<sup>a</sup> and Elena Gaeva<sup>a</sup>

<sup>a</sup>Institute of Physical and Organic Chemistry, Southern Federal University,  
Stachki Av., 194/2, Rostov on Don, 344090, Russia.

\*E-mail address: avmetelitsa@sfnu.ru.

<sup>b</sup>North-Caucasus Federal University,  
Dzerzhinsky str. 120/3, Stavropol, 355035, Russia.

E-mail address: odemidov@ncfu.ru

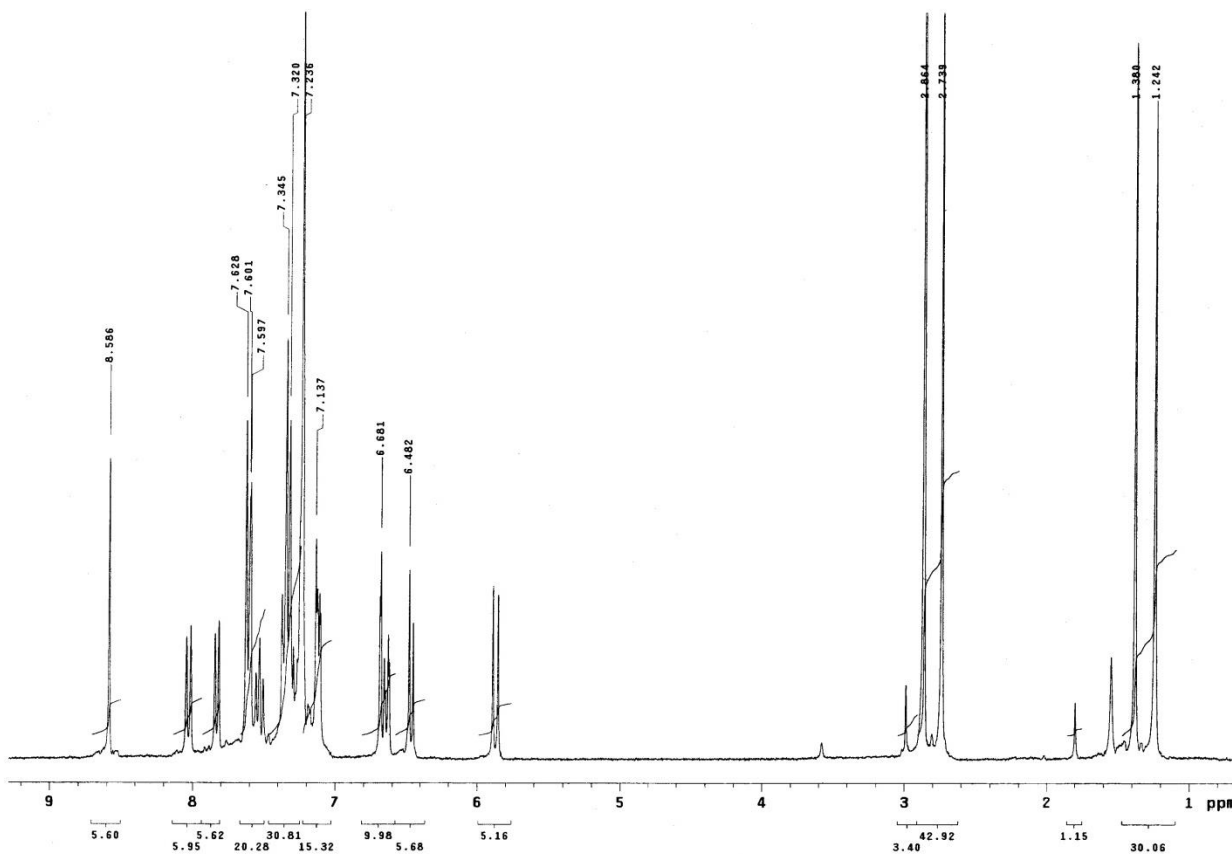

Fig. S1. <sup>1</sup>H NMR spectrum of SPP 1 in CDCl<sub>3</sub>.

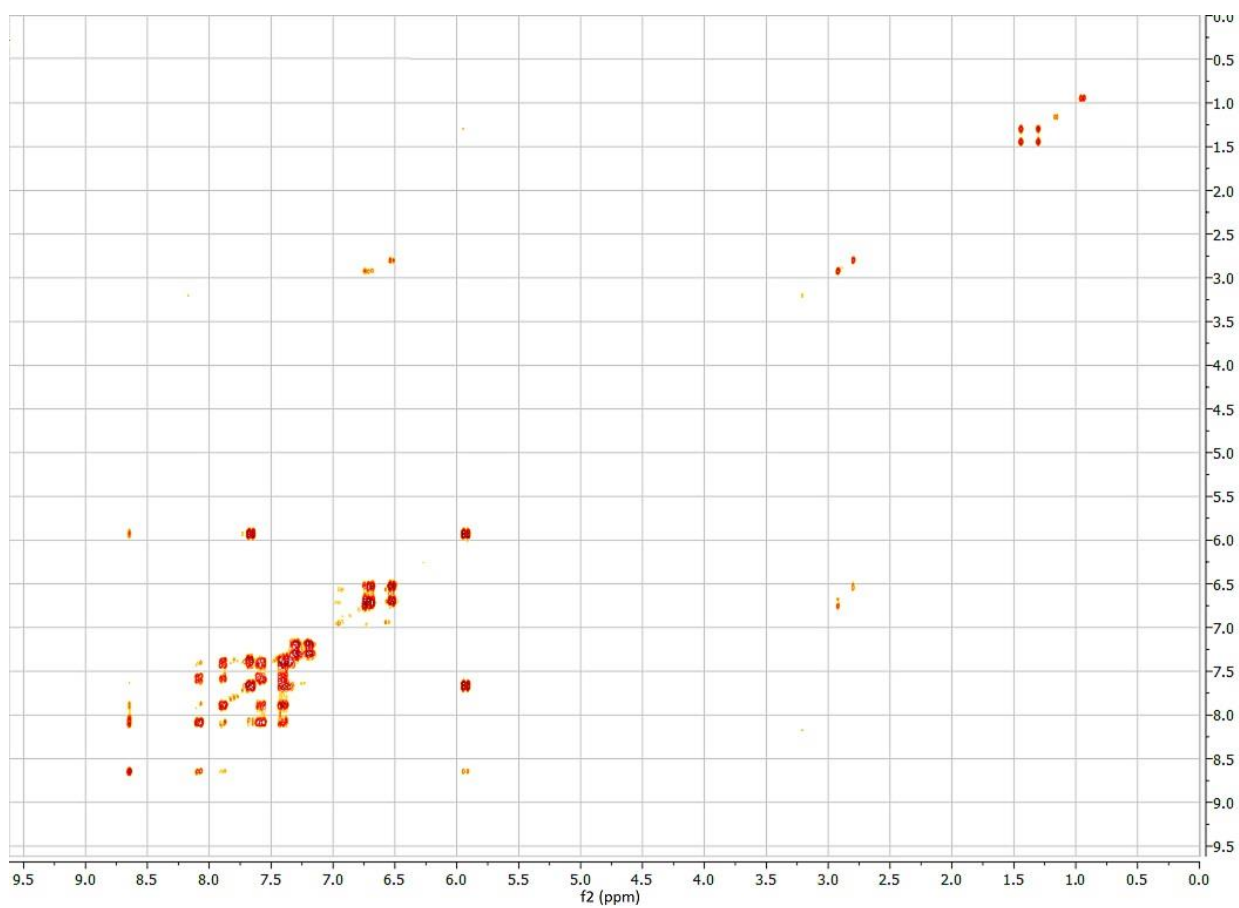

**Fig. S2.** 2D NMR  $^1\text{H}$ - $^1\text{H}$  COSY spectrum of SPP **1** in  $\text{CDCl}_3$ .

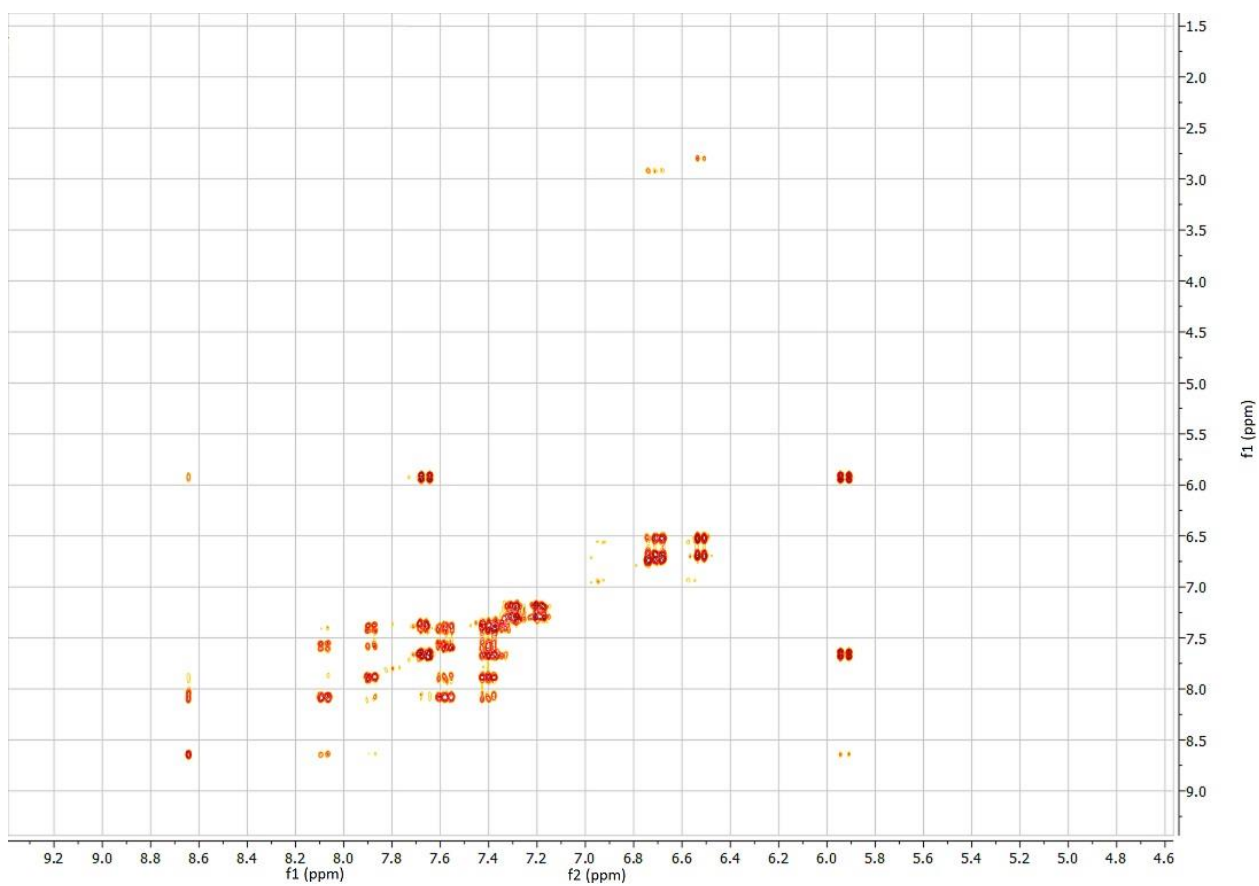

**Fig. S3.** 2D NMR  $^1\text{H}$ - $^1\text{H}$  COSY spectrum of SPP **1** in  $\text{CDCl}_3$  (expansion 4.6 to 9.2 ppm).

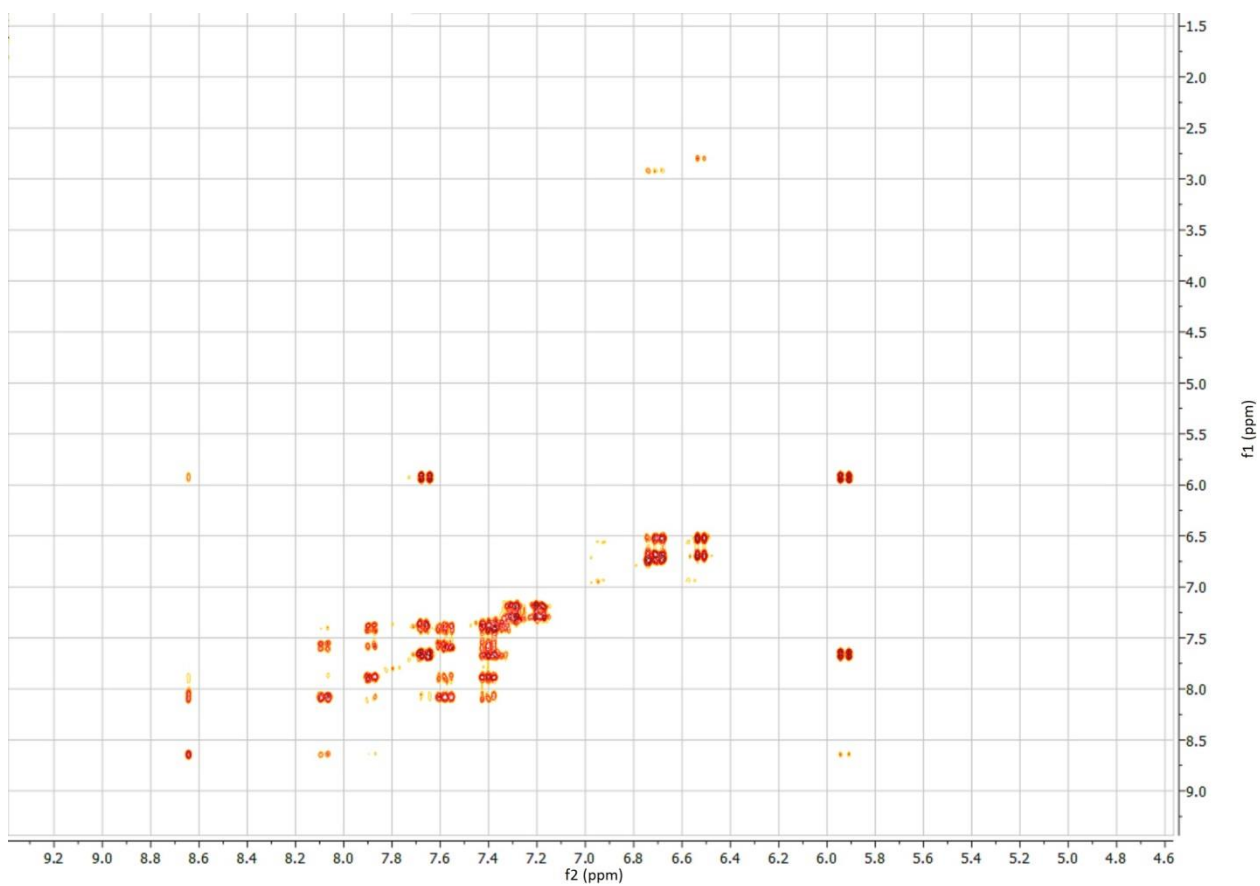

**Fig. S4.** 2D NMR HSQC <sup>1</sup>H-<sup>13</sup>C spectrum of SPP **1** in CDCl<sub>3</sub> (expansion 4.6 to 9.2 ppm).

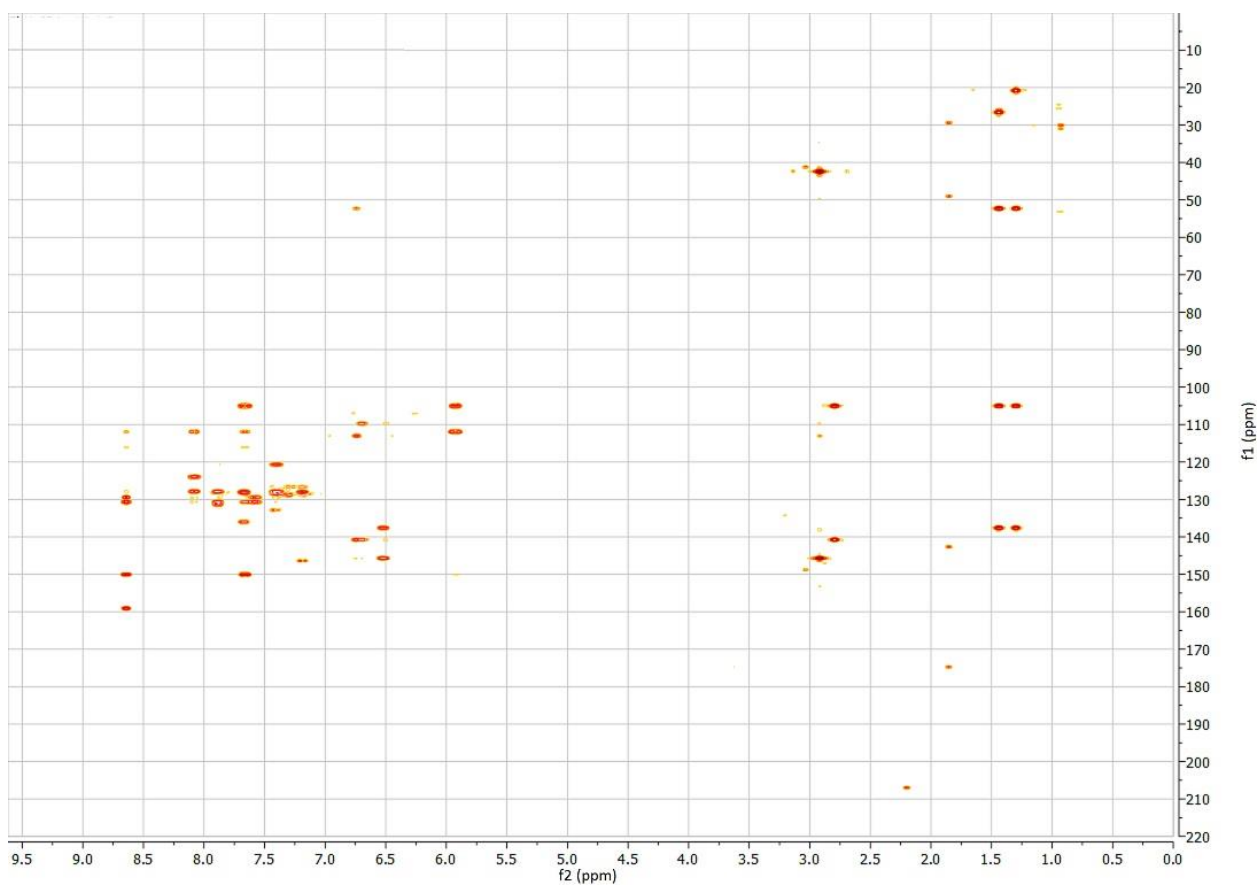

**Fig. S5.** 2D NMR HMBC <sup>1</sup>H-<sup>13</sup>C spectrum of SPP **1** in CDCl<sub>3</sub>.

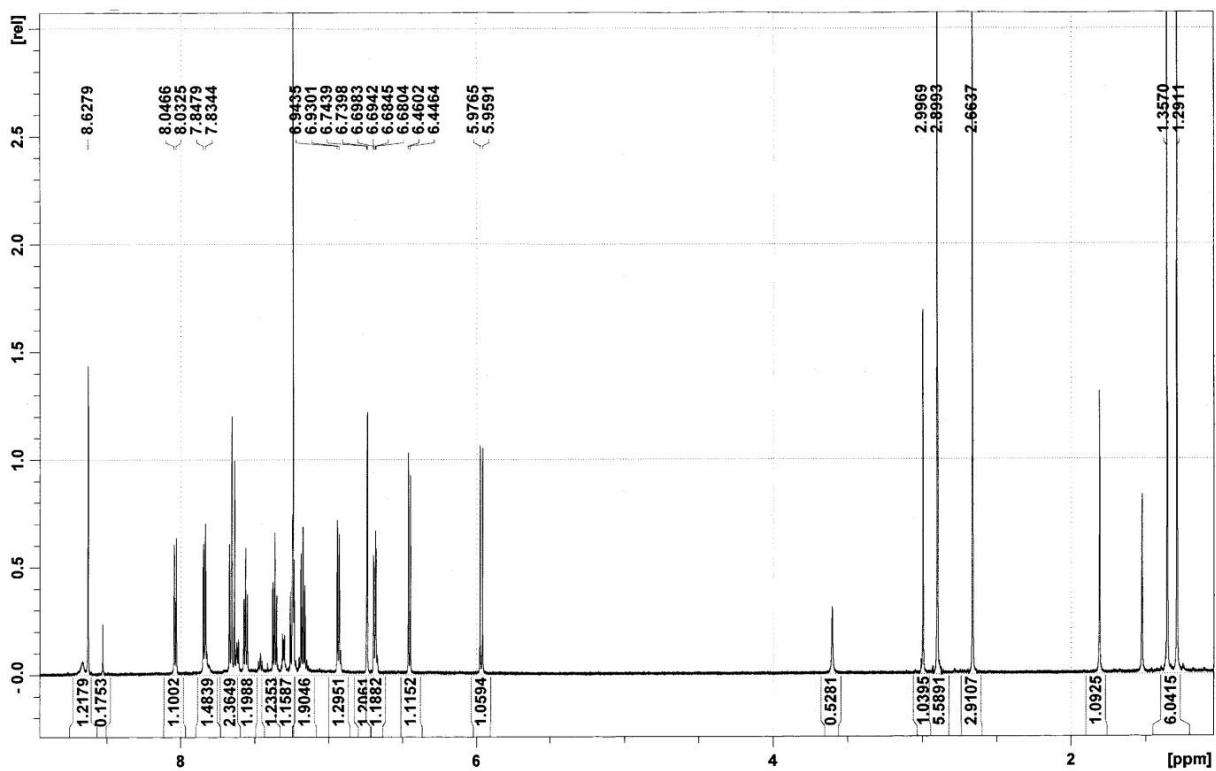

Fig. S6.  $^1\text{H}$  NMR spectrum of SPP 2 in  $\text{CDCl}_3$ .

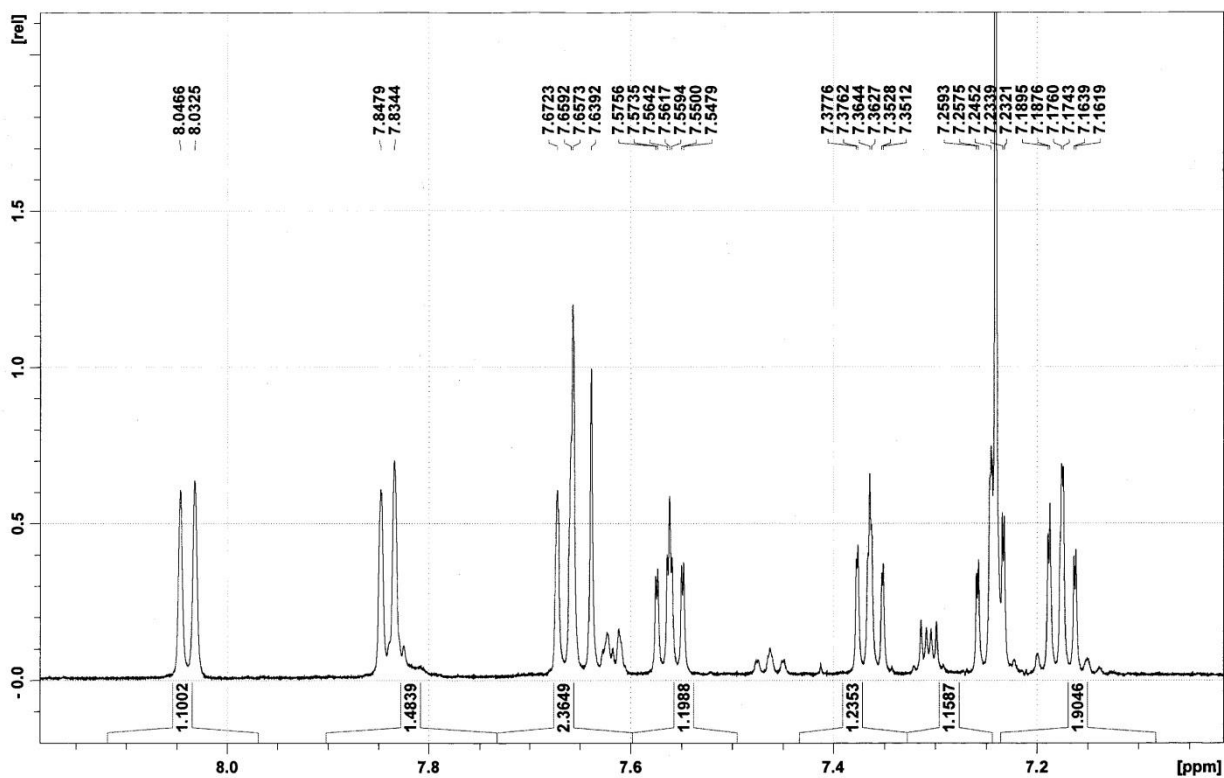

Fig. S7.  $^1\text{H}$  NMR spectrum of SPP 2 in  $\text{CDCl}_3$  (expansion 7.0 to 8.2 ppm).

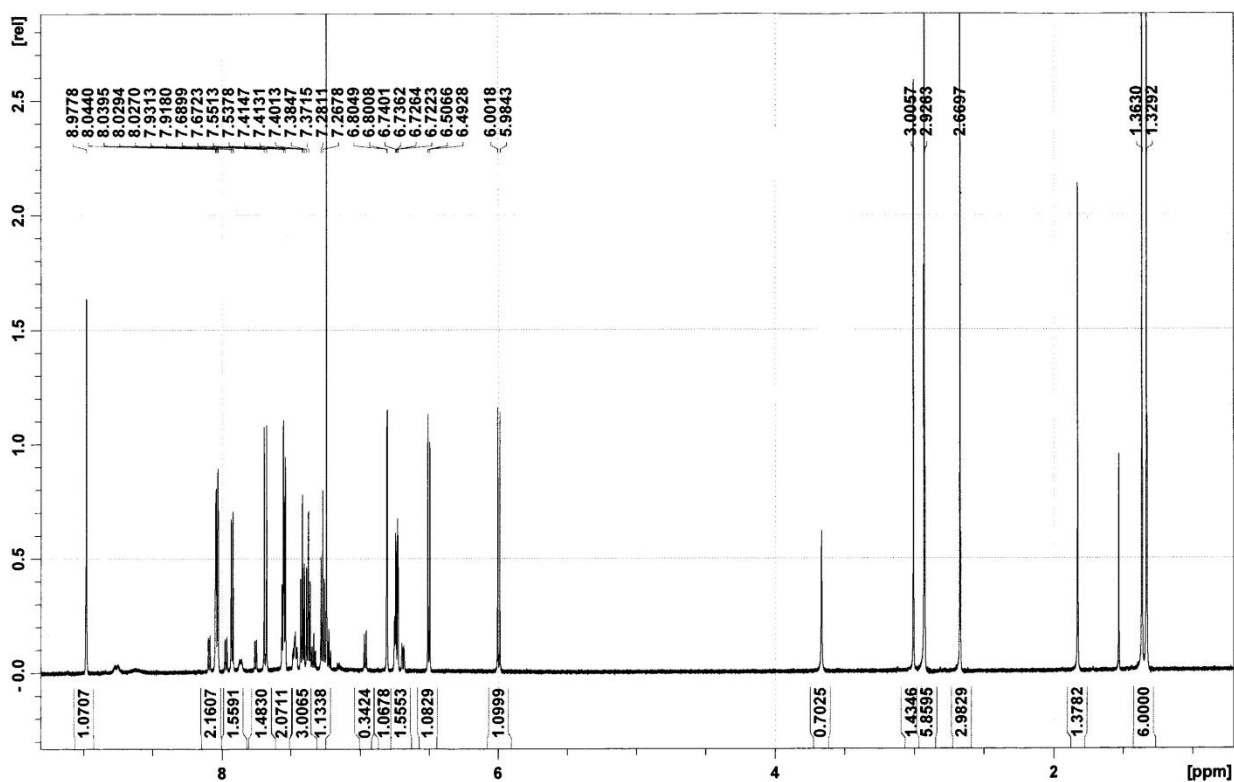

Fig. S8.  $^1\text{H}$  NMR spectrum of SPP 3 in  $\text{CDCl}_3$ .

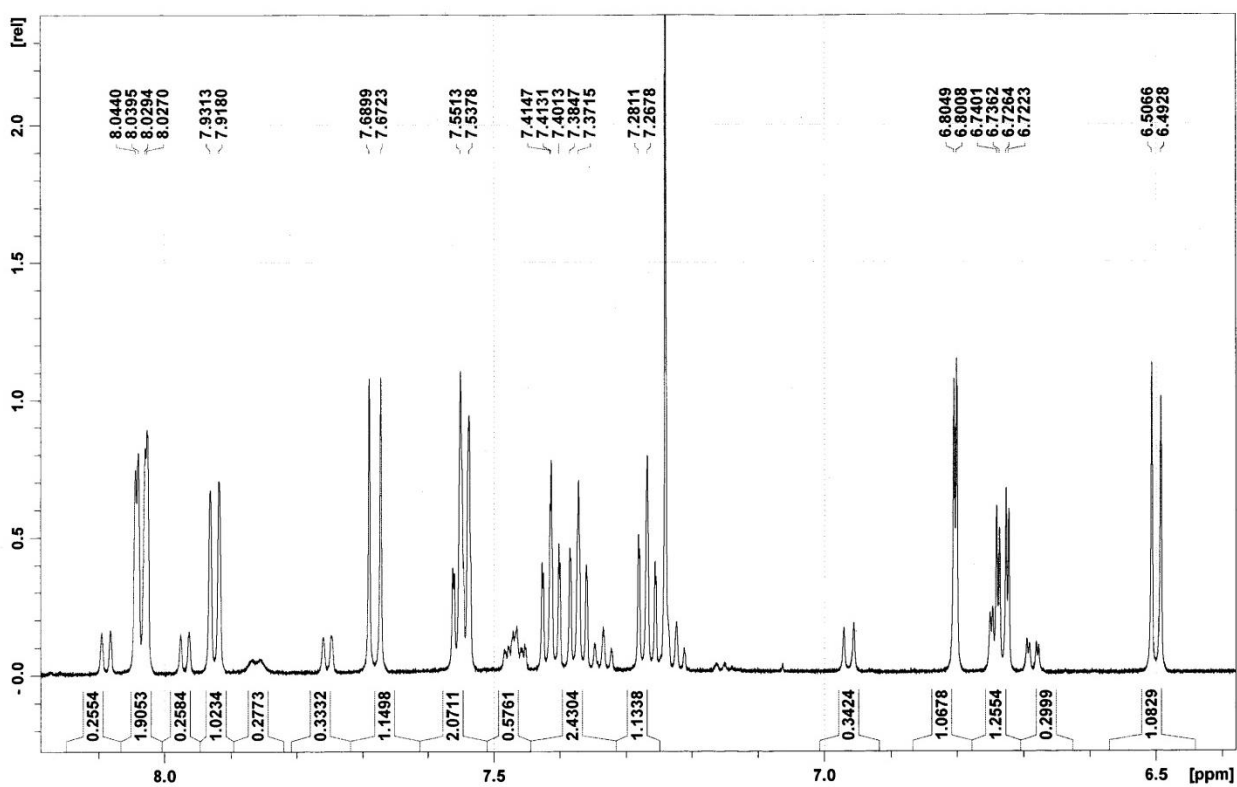

Fig. S9.  $^1\text{H}$  NMR spectrum of SPP 3 in  $\text{CDCl}_3$  (expansion 6.4 to 8.2 ppm).

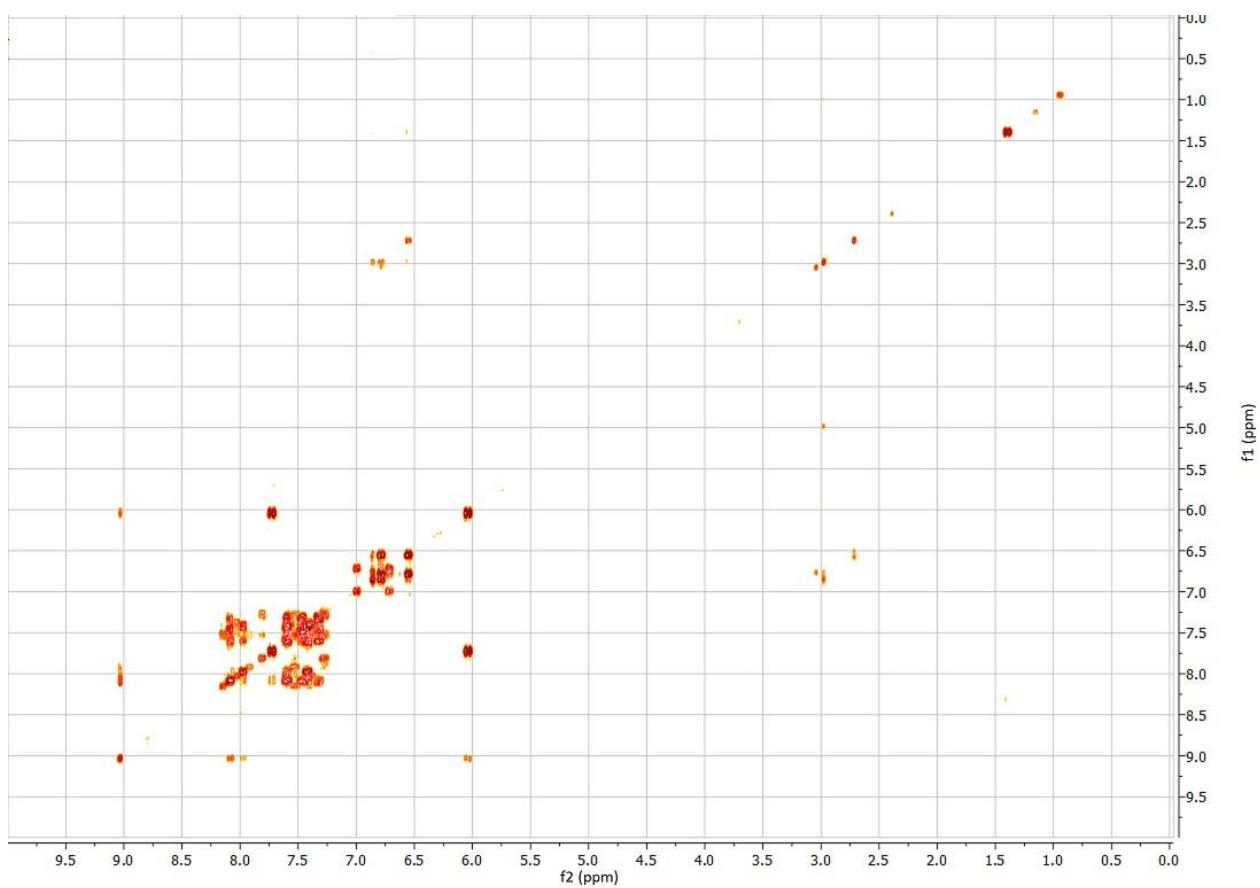

**Fig. S10.** 2D NMR  $^1\text{H}$ - $^1\text{H}$  COSY spectrum of SPP **3** in  $\text{CDCl}_3$ .

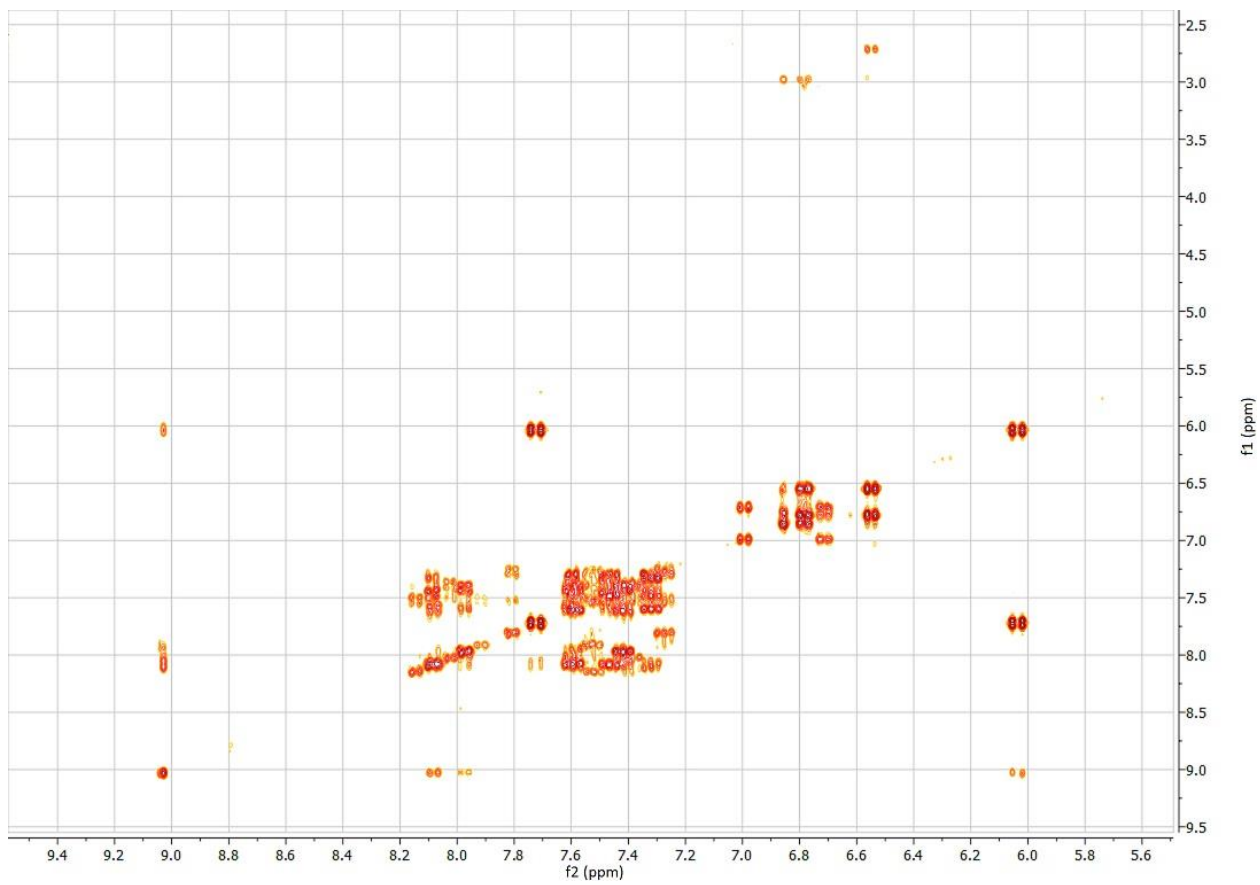

**Fig. S11.** 2D NMR  $^1\text{H}$ - $^1\text{H}$  COSY spectrum of SPP **3** in  $\text{CDCl}_3$  (expansion 5.6 to 9.4 ppm).

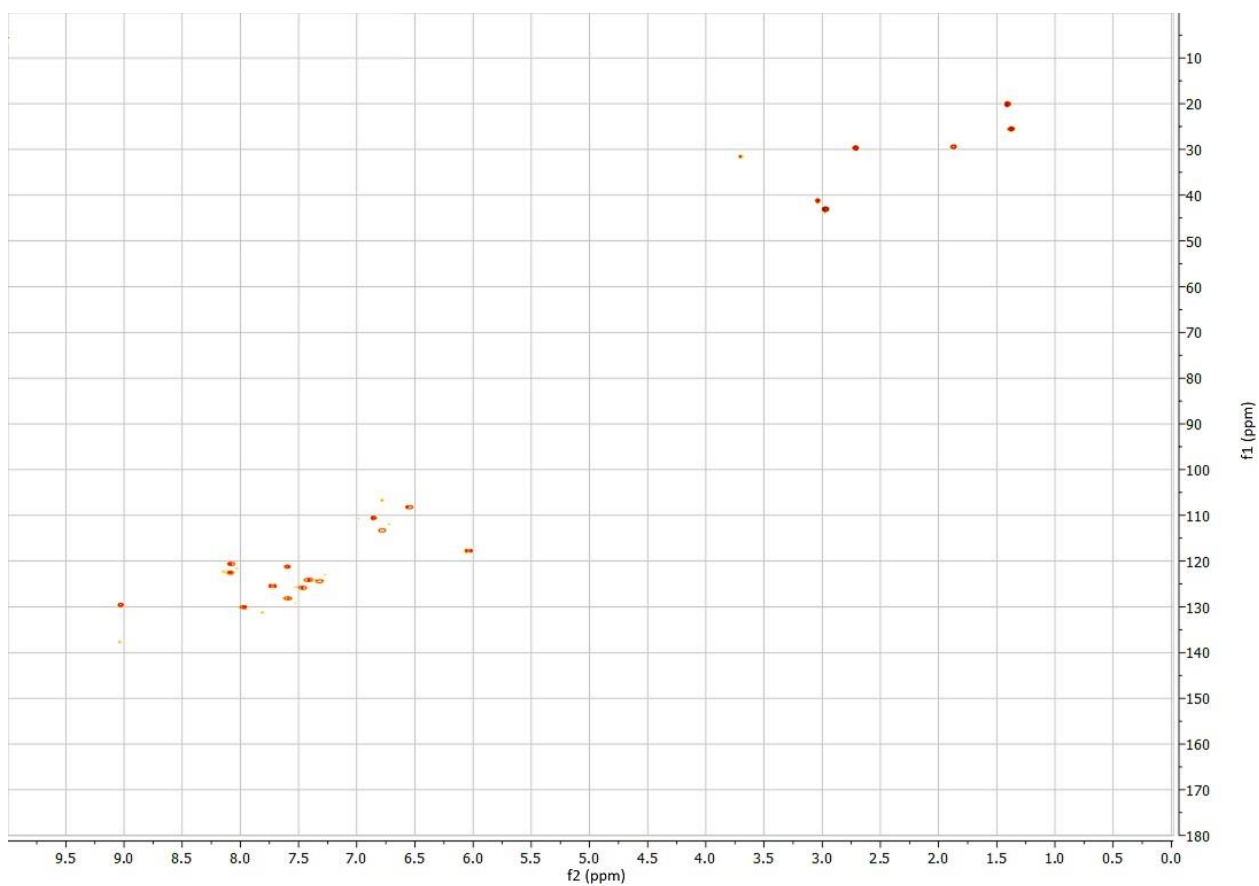

**Fig. S12.** 2D NMR HSQC  $^1\text{H}$ - $^{13}\text{C}$  spectrum of SPP **3** in  $\text{CDCl}_3$ .

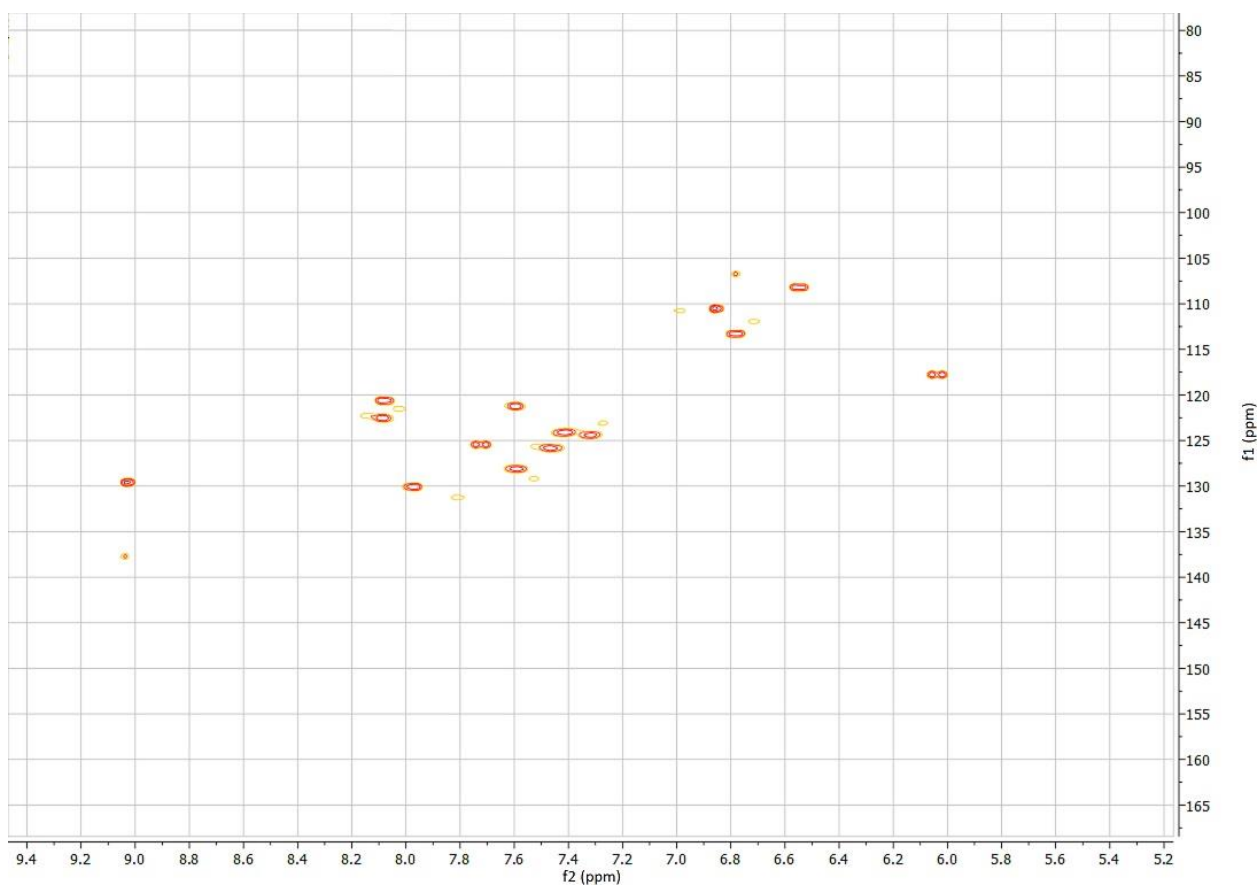

**Fig. S13.** 2D NMR HSQC  $^1\text{H}$ - $^{13}\text{C}$  spectrum of SPP **3** in  $\text{CDCl}_3$  (expansion 5.2 to 9.4 ppm).

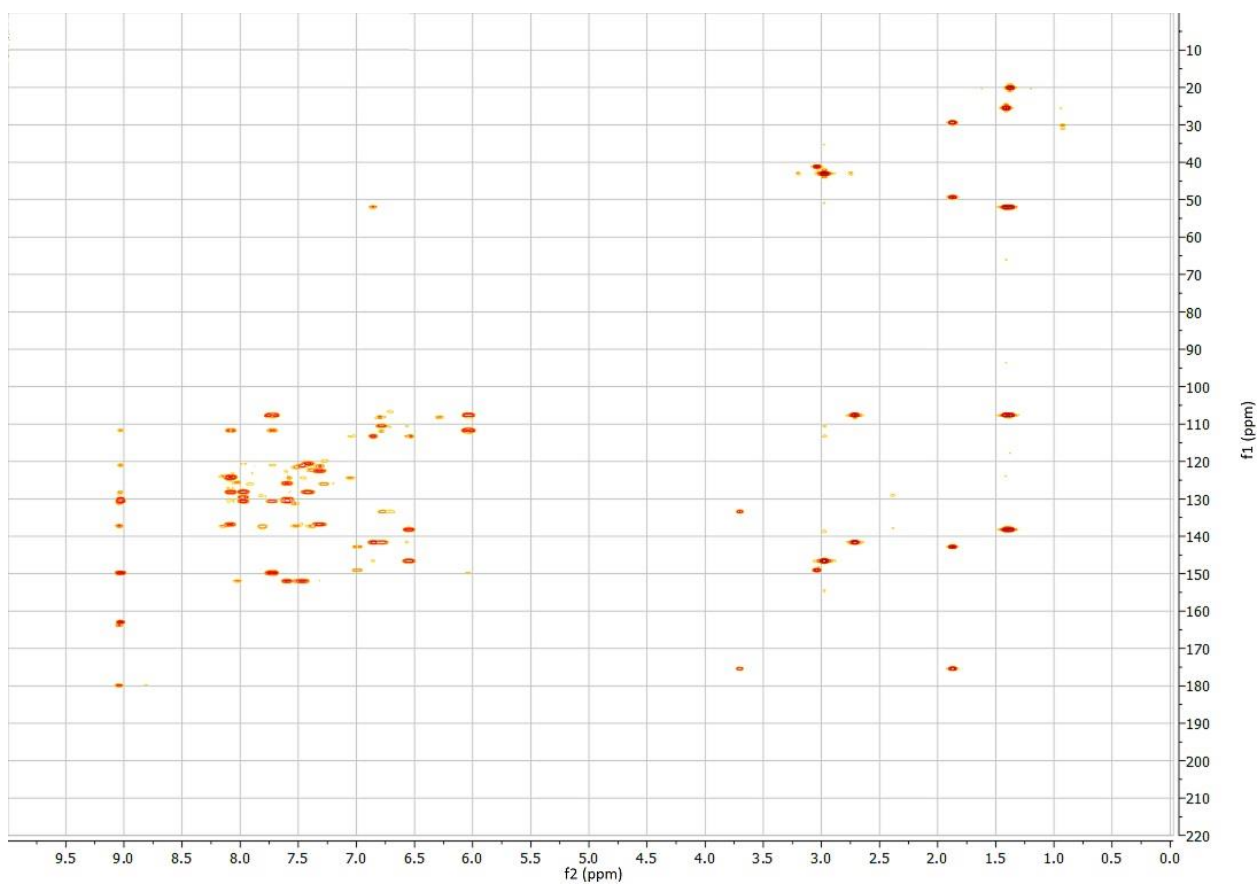

**Fig. S14.** 2D NMR HMBC  $^1\text{H}$ - $^{13}\text{C}$  spectrum of SPP **3** in  $\text{CDCl}_3$ .

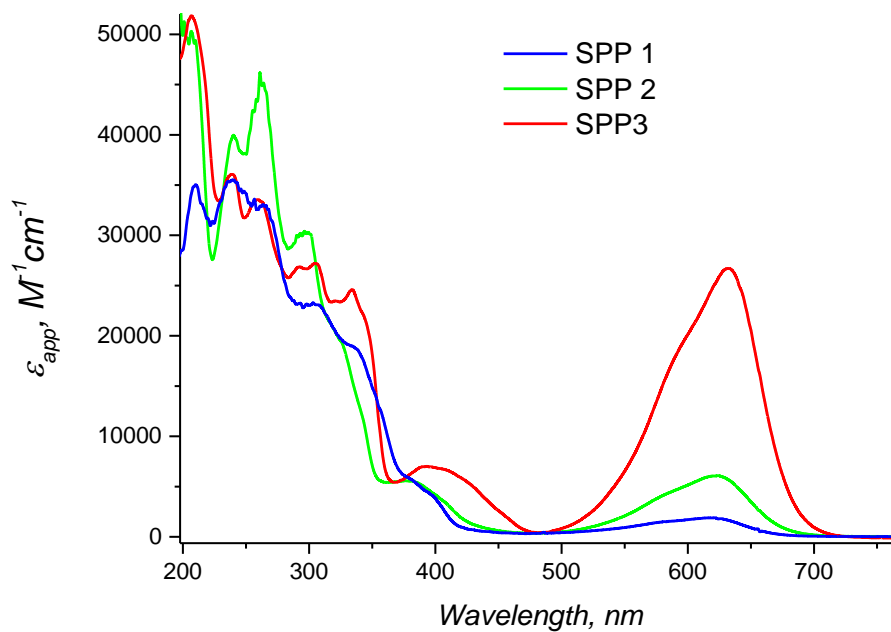

**Fig. S15.** Absorption spectra of the equilibrium mixture of cyclic forms **A** and merocyanine isomers **B** of SPPs **1-3** in acetonitrile at 293 K.



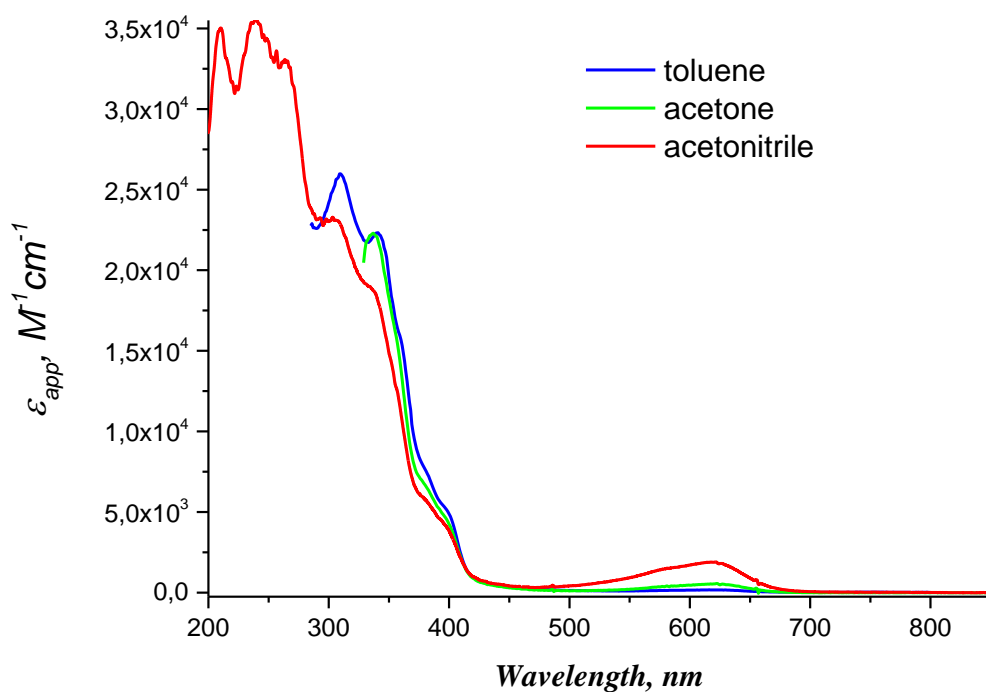

**Fig. S16.** Absorption spectra of the equilibrium mixture of cyclic isomers **A** and merocyanines **B** of SPP **1** in different solvents: toluene, acetone and acetonitrile at 293 K.

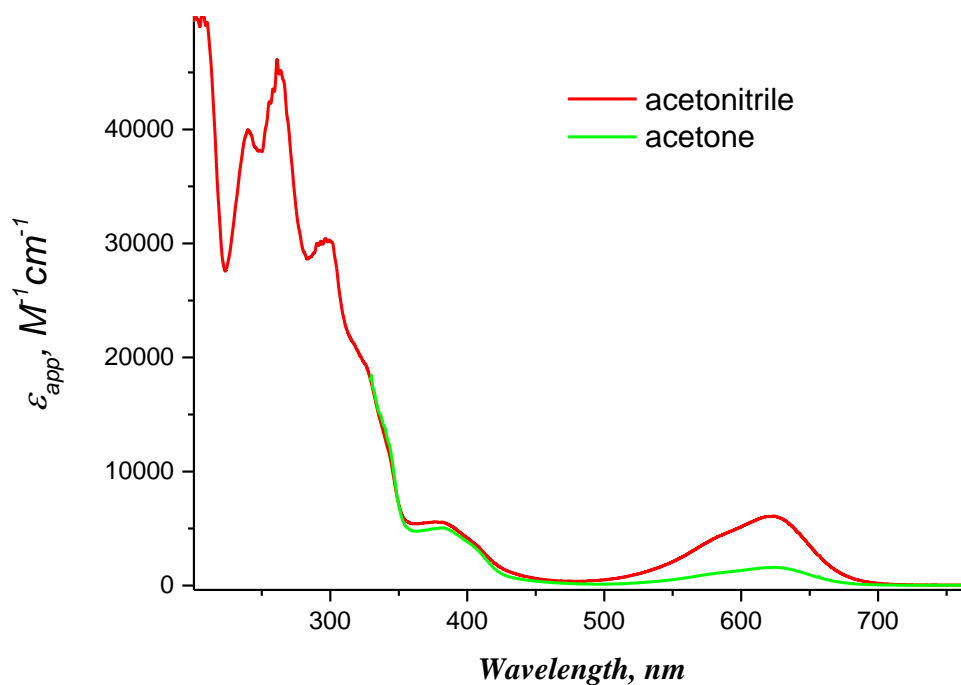

**Fig. S17.** Absorption spectra of the equilibrium mixture of cyclic isomers **A** and merocyanines **B** of SPP **2** in different solvents: **toluene**, acetone and acetonitrile at 293 K.

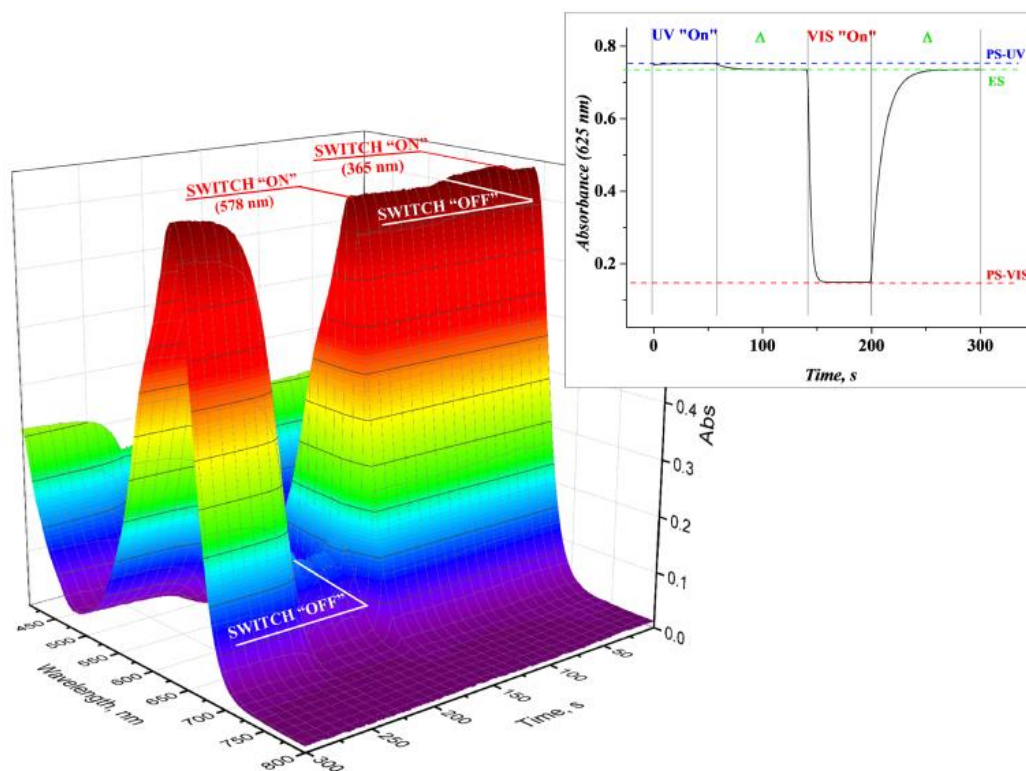

**Fig. S18** Spectral and kinetic profile of the operating cycle of the bipolar absorption switch based on SPP 3 in acetone (insert: Kinetic profile at the maximum of the absorption band of the MC isomer).

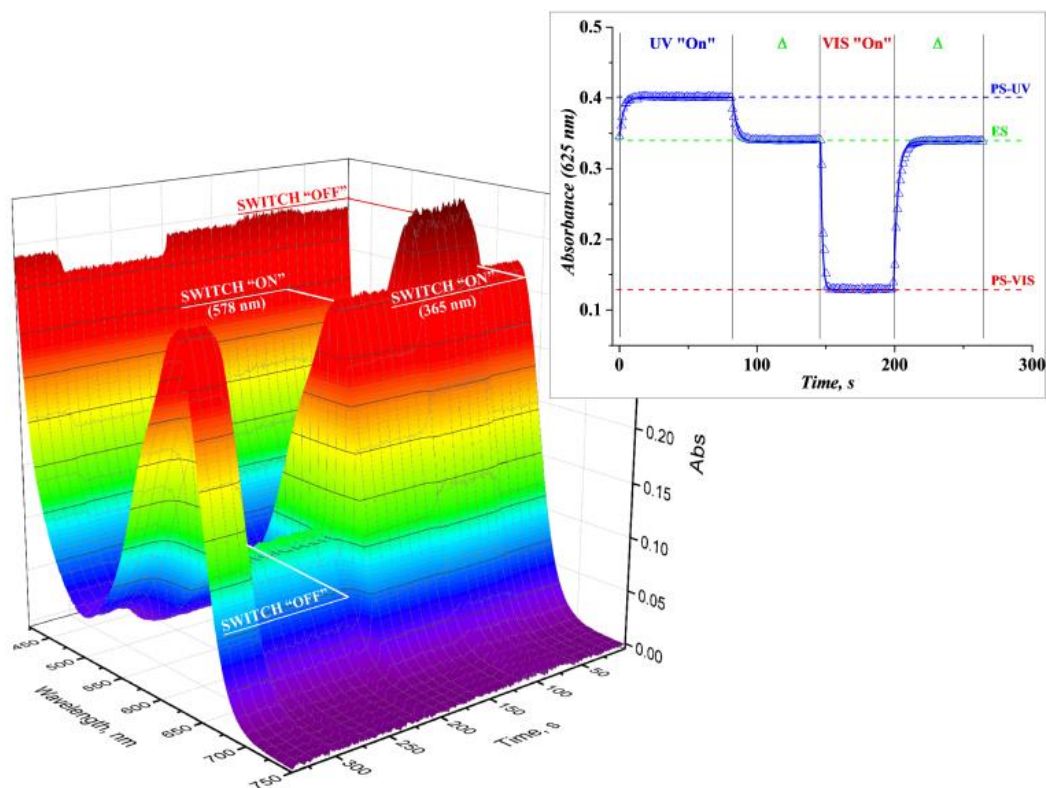

**Fig. S19** Spectral and kinetic profile of the operating cycle of the bipolar absorption switch based on SPP 2 in acetone (insert: Kinetic profile at the maximum of the absorption band of the MC isomer).

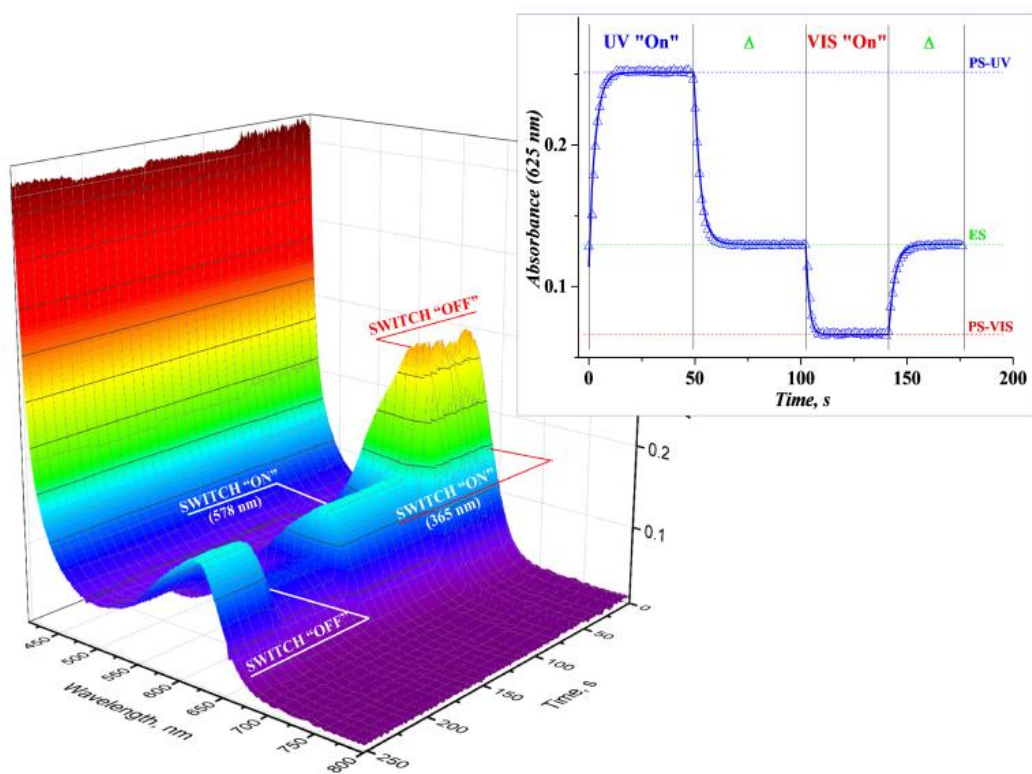

**Fig. S20** Spectral and kinetic profile of the operating cycle of the bipolar absorption switch based on SPP **1** in acetone (insert: Kinetic profile at the maximum of the absorption band of the MC isomer).
